# Supplementary material
Source: PubMed Central journal article supplement (PMC8170737)
Supplement: 12985_2021_1556_MOESM1_ESM.pdf [file 12985_2021_1556_MOESM1_ESM.pdf]

# SARS-CoV-2 in hospital indoor environments is predominantly non-infectious

Janina Krambrich, Dario Akaberi, Jiaxin Ling, Tove Hoffman, Lennart Svensson, Marie Hagbom, Åke Lundkvist

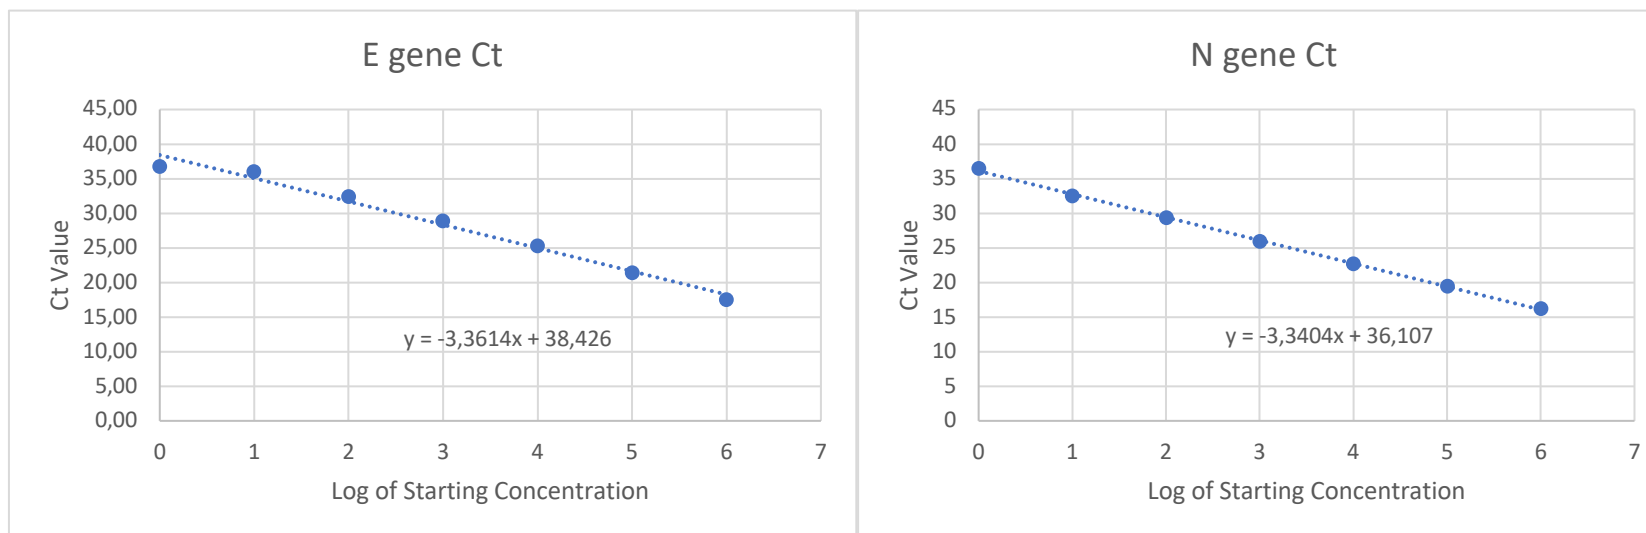

**Figure S1: Standard curves generated with synthetic DNA gene fragments for correlating of copy numbers and Ct values**

Standard curves generated with synthetic DNA gene fragments (gBLOCKs; IDT®, San Jose, CA, USA) with a five base-pair deletion in the amplified regions of the viral genome diluted in deionized, nuclease-free water to concentrations of  $10^{-1}$  to  $10^6$  copies per  $\mu\text{l}$ . The linear equation can be used to calculate the corresponding copy numbers for Ct values.

**Table S1: RT-qPCR validation results.**

|                                          | E gene                                                                               | N gene                                    |
|------------------------------------------|--------------------------------------------------------------------------------------|-------------------------------------------|
| <b>Limit of detection (LOD)</b>          | $10^1$ copies/ $\mu\text{l}$                                                         | $10^1$ copies/ $\mu\text{l}$              |
| <b>Efficiency (E)</b>                    | 101.5%                                                                               | 103.1%                                    |
| <b>Coefficient of determination (R2)</b> | 0.987                                                                                | 0.998                                     |
| <b>Linear dynamic range (LDR)</b>        | $10^6$ to $10^{-1}$ copies/ $\mu\text{l}$                                            | $10^6$ to $10^{-1}$ copies/ $\mu\text{l}$ |
| <b>Specificity</b>                       | Determined by amplicon size visualized through gel electrophoresis and by sequencing |                                           |

Validation result for the used SARS-CoV-2 RT-qPCR assay.

Table S2: Ct values for all collected samples at the Uppsala University infectious disease ward

| RT-qPCR results for all swabs taken at the Akademiska Hospital Infectious Disease ward in Uppsala, Sweden |             |                 |        |              |           |                 |        |              |             |                 |        |              |           |                 |        |
|-----------------------------------------------------------------------------------------------------------|-------------|-----------------|--------|--------------|-----------|-----------------|--------|--------------|-------------|-----------------|--------|--------------|-----------|-----------------|--------|
| Sample group                                                                                              | Sub group   | RT-qPCR results |        | Sample group | Sub group | RT-qPCR results |        | Sample group | Sub group   | RT-qPCR results |        | Sample group | Sub group | RT-qPCR results |        |
|                                                                                                           |             | N gene          | E gene |              |           | N gene          | E gene |              |             | N gene          | E gene |              |           | N gene          | E gene |
| Medical staff area                                                                                        | Computer    | -               | 37.78  | Patient area | Floor     | 33.78           | 32.36  | Patient area | Ventilation | 37.26           | 36.14  | Shoes        | Shoes     | 38.18           | -      |
| Medical staff area                                                                                        | Computer    | -               | -      | Patient area | Floor     | 34.72           | 34.02  | Patient area | Ventilation | 37.56           | 35.28  | Shoes        | Shoes     | 38.70           | -      |
| Medical staff area                                                                                        | Computer    | -               | -      | Patient area | Floor     | 34.75           | 33.60  | Patient area | Ventilation | 37.94           | 37.90  | Shoes        | Shoes     | 38.71           | -      |
| Medical staff area                                                                                        | Computer    | -               | -      | Patient area | Floor     | 36.37           | 35.12  | Patient area | Ventilation | 38.61           | 37.55  | Shoes        | Shoes     | 39.76           | -      |
| Medical staff area                                                                                        | Computer    | -               | -      | Patient area | Floor     | 37.09           | 36.90  | Patient area | Ventilation | 38.75           | 38.45  | Shoes        | Shoes     | 34.84           | 35.37  |
| Medical staff area                                                                                        | Computer    | -               | -      | Patient area | Floor     | 37.24           | 34.14  | Patient area | Ventilation | 38.82           | 37.26  | Shoes        | Shoes     | 35.07           | 33.79  |
| Medical staff area                                                                                        | Floor       | 36.00           | 35.46  | Patient area | Floor     | 37.28           | 36.67  | Patient area | Ventilation | 39.55           | 38.71  | Shoes        | Shoes     | 35.27           | 35.09  |
| Medical staff area                                                                                        | Floor       | 36.60           | 37.81  | Patient area | Floor     | 37.62           | 36.29  | Patient area | Ventilation | 39.77           | 38.95  | Shoes        | Shoes     | 36.16           | 34.87  |
| Medical staff area                                                                                        | Floor       | 38.60           | 36.26  | Patient area | Floor     | 38.31           | 35.85  | Patient area | Ventilation | -               | 39.83  | Shoes        | Shoes     | 36.76           | 36.75  |
| Medical staff area                                                                                        | Floor       | 37.64           | -      | Patient area | Floor     | 38.61           | 35.64  | Patient area | Ventilation | -               | 38.74  | Shoes        | Shoes     | 37.73           | 36.52  |
| Medical staff area                                                                                        | Floor       | 38.02           | -      | Patient area | Floor     | 38.86           | 36.64  | Patient area | Ventilation | -               | 38.63  | Shoes        | Shoes     | 37.74           | 36.52  |
| Medical staff area                                                                                        | Floor       | 38.06           | -      | Patient area | Floor     | 38.97           | 37.82  | Patient area | Ventilation | -               | 37.76  | Shoes        | Shoes     | 38.00           | 36.68  |
| Medical staff area                                                                                        | Floor       | -               | -      | Patient area | Floor     | 39.22           | 34.39  | Patient area | Ventilation | -               | 36.78  | Shoes        | Shoes     | 38.76           | 36.73  |
| Medical staff area                                                                                        | Floor       | -               | -      | Patient area | Floor     | -               | 37.86  | Patient area | Ventilation | -               | -      | Shoes        | Shoes     | 38.77           | 36.23  |
| Medical staff area                                                                                        | Door handle | -               | -      | Patient area | Floor     | -               | 37.77  | Patient area | Ventilation | -               | -      | Shoes        | Shoes     | -               | 36.55  |
| Medical staff area                                                                                        | Door handle | -               | -      | Patient area | Floor     | -               | 37.21  | Patient area | Ventilation | -               | -      | Shoes        | Shoes     | -               | 35.37  |
| Medical staff area                                                                                        | Door handle | -               | -      | Patient area | Floor     | -               | 36.70  | Patient area | Ventilation | -               | -      | Shoes        | Shoes     | -               | -      |
| Medical staff area                                                                                        | Door handle | -               | -      | Patient area | Floor     | -               | 36.54  | Patient area | Ventilation | -               | -      | Shoes        | Shoes     | -               | -      |
| Medical staff area                                                                                        | Door handle | -               | -      | Patient area | Floor     | -               | -      | Patient area | Ventilation | -               | -      | Shoes        | Shoes     | -               | -      |
| Medical staff area                                                                                        | Door handle | -               | -      | Patient area | Floor     | -               | -      | Patient area | Ventilation | -               | -      | Shoes        | Shoes     | -               | -      |
| Medical staff area                                                                                        | Door handle | -               | -      | Patient area | Floor     | -               | -      | Patient area | Ventilation | -               | -      | Shoes        | Shoes     | -               | -      |
| Medical staff area                                                                                        | Door handle | -               | -      | Patient area | Floor     | -               | -      | Patient area | Ventilation | -               | -      | Shoes        | Shoes     | -               | -      |
| Patient area                                                                                              | Air         | -               | -      | Patient area | Floor     | -               | -      | Patient area | Ventilation | -               | -      | Shoes        | Shoes     | -               | -      |
| Patient area                                                                                              | Air         | -               | -      | Patient area | Floor     | -               | -      | Patient area | Ventilation | -               | -      | Shoes        | Shoes     | -               | -      |
| Patient area                                                                                              | Air         | -               | -      | Patient area | Floor     | -               | -      | Patient area | Ventilation | -               | -      | Shoes        | Shoes     | -               | -      |
| Patient area                                                                                              | Air         | -               | -      | Patient area | Floor     | -               | -      | Patient area | Ventilation | -               | -      | Shoes        | Shoes     | -               | -      |
| Patient area                                                                                              | Air         | -               | -      | Patient area | Floor     | -               | -      | Patient area | Ventilation | -               | -      | Shoes        | Shoes     | -               | -      |
| Patient area                                                                                              | Air         | -               | -      | Patient area | Floor     | -               | -      | Patient area | Ventilation | -               | -      | Shoes        | Shoes     | -               | -      |
| Patient area                                                                                              | Air         | -               | -      | Patient area | Floor     | -               | -      | Patient area | Ventilation | -               | -      | Shoes        | Shoes     | -               | -      |
| Patient area                                                                                              | Air         | -               | -      | Patient area | Floor     | -               | -      | Patient area | Ventilation | -               | -      | Shoes        | Shoes     | -               | -      |
| Patient area                                                                                              | Air         | -               | -      | Patient area | Floor     | -               | -      | Patient area | Ventilation | -               | -      | Shoes        | Shoes     | -               | -      |
| Patient area                                                                                              | Air         | -               | -      | Patient area | Floor     | -               | -      | Patient area | Ventilation | -               | -      | Shoes        | Shoes     | -               | -      |
| Patient area                                                                                              | Air         | -               | -      | Patient area | Floor     | -               | -      | Patient area | Ventilation | -               | -      | Shoes        | Shoes     | -               | -      |
| Patient area                                                                                              | Air         | -               | -      | Patient area | Floor     | -               | -      | Patient area | Ventilation | -               | -      | Shoes        | Shoes     | -               | -      |
| Patient area                                                                                              | Air         | -               | -      | Patient area | Floor     | -               | -      | Patient area | Ventilation | -               | -      | Shoes        | Shoes     | -               | -      |
| Patient area                                                                                              | Bathroom    | -               | -      | Patient area | Floor     | -               | -      | Patient area | Ventilation | -               | -      | Shoes        | Shoes     | -               | -      |
| Patient area                                                                                              | Bathroom    | -               | -      | Patient area | Floor     | -               | -      | Patient area | Ventilation | -               | -      | Shoes        | Shoes     | -               | -      |
| Patient area                                                                                              | Bathroom    | -               | -      | Patient area | Floor     | -               | -      | Patient area | Ventilation | -               | -      | Shoes        | Shoes     | -               | -      |

|              |          |       |       |              |             |       |       |                 |                          |       |       |             |             |       |       |
|--------------|----------|-------|-------|--------------|-------------|-------|-------|-----------------|--------------------------|-------|-------|-------------|-------------|-------|-------|
| Patient area | Bathroom | -     | -     | Patient area | Floor       | -     | -     | Patient area    | Ventilation              | -     | -     | Shoes       | Shoes       | -     | -     |
| Patient area | Bathroom | -     | -     | Patient area | Floor       | -     | -     | Patient area    | Ventilation              | -     | -     | Ventilation | Ventilation | 35.32 | 35.41 |
| Patient area | Bathroom | -     | -     | Patient area | Floor       | -     | -     | Patient area    | Ventilation              | -     | -     | Ventilation | Ventilation | 35.72 | 33.85 |
| Patient area | Bathroom | -     | -     | Patient area | Door handle | -     | -     | Patient area    | Ventilation              | -     | -     | Ventilation | Ventilation | 36.31 | 34.87 |
| Patient area | Bed      | 35.50 | 35.10 | Patient area | Door handle | -     | -     | Patient area    | Ventilation              | -     | -     | Ventilation | Ventilation | 36.72 | 36.08 |
| Patient area | Bed      | -     | -     | Patient area | Door handle | -     | -     | Patient area    | Ventilation              | -     | -     | Ventilation | Ventilation | 36.86 | 34.91 |
| Patient area | Bed      | -     | -     | Patient area | Ventilation | 39.04 | -     | Protective gear | Personal protective gear | 37.74 | 35.91 | Ventilation | Ventilation | 37.13 | 37.30 |
| Patient area | Floor    | 37.29 | -     | Patient area | Ventilation | 39.28 | -     | Protective gear | Personal protective gear | 37.98 | 36.73 | Ventilation | Ventilation | 37.42 | 38.70 |
| Patient area | Floor    | 37.34 | -     | Patient area | Ventilation | 39.53 | -     | Protective gear | Personal protective gear | -     | -     | Ventilation | Ventilation | 38.79 | 36.96 |
| Patient area | Floor    | 37.58 | -     | Patient area | Ventilation | 39.78 | -     | Protective gear | Personal protective gear | -     | -     | Ventilation | Ventilation | -     | 38.40 |
| Patient area | Floor    | 38.21 | -     | Patient area | Ventilation | 39.95 | -     | Protective gear | Personal protective gear | -     | -     | Ventilation | Ventilation | -     | -     |
| Patient area | Floor    | 38.79 | -     | Patient area | Ventilation | 35.33 | 33.77 | Shoes           | Shoes                    | -     | -     | Ventilation | Ventilation | -     | -     |
| Patient area | Floor    | 38.90 | -     | Patient area | Ventilation | 36.09 | 33.93 | Shoes           | Shoes                    | 37.31 | -     | Ventilation | Ventilation | -     | -     |
| Patient area | Floor    | 38.93 | -     | Patient area | Ventilation | 36.24 | 36.70 | Shoes           | Shoes                    | 37.48 | -     | Ventilation | Ventilation | -     | -     |
| Patient area | Floor    | 32.81 | 30.57 | Patient area | Ventilation | 36.78 | 35.31 | Shoes           | Shoes                    | 37.97 | -     | Ventilation | Ventilation | -     | -     |

*Medical staff areas, to which only staff in contact with COVID-19 patients had access – including anterooms, break rooms, a staff kitchen, staff computers, and the ward corridor; Patient areas where COVID-19 patients received treatment - including the patient room, patient bathroom, and ventilation openings in the patient rooms; Personal protective equipment – including aprons and face shields used by medical staff in patient rooms; Shoes – footwear used in patient rooms and in medical staff areas; and the Ventilation system – including central ventilation ducts where air from wards, patient rooms, and medical staff areas was collected and filtered*
